# Supplementary material
Source: ML conference proceedings conference paper supplement (https://proceedings.mlr.press/v48/wangg16.html)
Supplement: Supplementary file [file wangg16-supp.pdf]

## A. Proof of Theorem 6

**Theorem 6.** Suppose  $\mathbb{E}[N_i | \mathcal{H}_{t_i}] = \int_0^{t_i} g^*(w^* \cdot x_t) dt$ , where  $g^*$  is monotonic increasing, 1-Lipschitz and  $\|w^*\| \leq W$ . Then with probability at least  $1 - \delta$ , there exist some iteration  $k < O\left(\left(\frac{Wn}{\log(Wn/\delta)}\right)^{1/3}\right)$  such that

$$\varepsilon(\hat{g}^k, \hat{w}^k) \leq O\left(\left(\frac{W^2 \log(Wn/\delta)}{n}\right)^{1/3}\right).$$

**Notations.** We define some extra notations. First we rewrite the integral as  $\int_0^{t_i} g^*(w^* \cdot x_t) dt = \sum_{j \in \mathcal{S}_i} a_{ij} g^*(w^* \cdot x_j)$ . Set  $y_i^* = g^*(w^* \cdot x_i)$  to be the expected value of each  $y_i$ . Let  $\bar{N}_i$  be the expected value of  $N_i$ . Then we have  $\bar{N}_i = \sum_{j \in \mathcal{S}_i} a_{ij} y_j^*$ . Clearly we do not have access to  $\bar{N}_i$ . However, consider a hypothetical call to the algorithm with input  $\{(x_i, \bar{N}_i)\}_{i=1}^n$  and suppose it returns  $\bar{g}^k$ . In this case, we define  $\bar{y}_i^k = \bar{g}^k(\bar{w}^k \cdot x_i)$ . Next we begin the proof and introduce Lemma 3-5.

**Analysis roadmap.** To prove Theorem 6, we establish several lemmas. The heart of the proof is Lemma 3, in which we show a property of the learned parameters  $\hat{w}^k$  at iteration  $k$ . That is, the squared distance  $\|\hat{w}^k - w^*\|^2$  between  $\hat{w}^k$  and the true direction  $w^*$  decreases at each iteration at a rate which depends on  $\varepsilon(\hat{g}^k, \hat{w}^k)$  and some other additive error terms  $\eta_1$  and  $\eta_2$ , which can be bounded respectively:

$$\|\hat{w}^k - w^*\|^2 - \|\hat{w}^{k+1} - w^*\|^2 \geq C_2 \varepsilon(\hat{g}^k, \hat{w}^k) - C_1(\eta_1 + \eta_2) \quad (16)$$

Lemma 4 bounds  $\eta_1 = O\left((K + \sqrt{4K^2 + 8k^2})(\log(\frac{1}{\delta}))^{1/2}\right)$  using martingale concentration inequality.

Lemma 5 bounds  $\eta_2 = O\left(\left(\frac{W^2 \log(Wn/\delta)}{n}\right)^{1/3}\right)$ . It relates  $\hat{y}_j^k$  (the value we can actually compute) and  $\bar{y}_j^k$  (the value we could compute if we had  $\bar{N}_i$ ).  $\bar{y}_j^k$  and  $\hat{y}_j^k$  will show up when we decouple  $\|\hat{w}^k - w^*\|^2 - \|\hat{w}^{k+1} - w^*\|^2$ .

Finally, we plug in the values of  $\eta_1$  and  $\eta_2$  to Lemma 3. Then we conduct telescoping sum of (16) and show there is at most  $O\left(W/(\eta_1 + \eta_2)\right)$  iterations before the error  $\varepsilon(\hat{g}^k, \hat{w}^k)$  is less than  $O(\eta_1 + \eta_2)$ . Since  $\eta_2$  is the dominant term compared with  $\eta_1$ , we replace  $\eta_1$  by  $\eta_2$  in the final results. This completes the proof.

Now we introduce Lemma 3-5 as follows.

**Lemma 3.** Suppose that  $\|w^k - w\| \leq W$ ,  $\|x_i\| \leq 1$ ,  $\sqrt{c} \leq \sum_{j \in \mathcal{S}_i} a_{ij} \leq \sqrt{C}$ ,  $\forall i \in [n], j \in [n]$  and  $y_j \leq M, \forall j \in [n]$ , and

$$\frac{1}{n} \sum_{i=1}^n (N_i - \bar{N}_i) \leq \eta_1, \quad \frac{1}{n} \sum_{i=1}^n \sum_{j \in \mathcal{S}_i} a_{ij} |\hat{y}_j^k - \bar{y}_j^k| \leq \eta_2$$

then the following formula holds:

$$\|\hat{w}^k - w^*\|^2 - \|\hat{w}^{k+1} - w^*\|^2 \geq C_2 \varepsilon(\hat{g}^k, \hat{w}^k) - C_1(\eta_1 + \eta_2) \quad (17)$$

where  $C_1 = \max\{5CW, 4M\sqrt{c} + 2CW\}$ ,  $C_2 = 2c - C$ .

The complete proof of Lemma 3 is in Appendix C.

**Lemma 4** (Martingale Concentration Inequality). Suppose  $dM(t) \leq K$ ,  $V(t) \leq k$  for all  $t > 0$  and some  $K, k \geq 0$ . With probability at least  $1 - \delta$ , it holds that

$$\frac{1}{n} \sum_{i=1}^n |N_i - \bar{N}_i| \leq O\left((K + \sqrt{4K^2 + 8k^2})(\log(1/\delta))^{1/2}\right).$$

Note  $N_i - \bar{N}_i = M_i$ , which is the martingale at time  $t_i$ . A continuous martingale is a stochastic process such that  $\mathbb{E}[M_t | \{M_\tau, \tau \leq s\}] = M_s$ . It means the conditional expectation of an observation at time  $t$  is equal to the observation at time  $s$ , given all the observations up to time  $s \leq t$ .  $V(t)$  is the variation process. It is shown in (Aalen et al., 2008) that  $V(t) = \Lambda(t) = \int_0^t \lambda(s) ds$ , which is the compensator for point process  $N(t)$ . The martingale serves as the noise term in point processes (similar to Gaussian noise in regression) and can be bounded using the Bernstein-type concentration inequality. The proof is in Appendix D.

**Lemma 5.** (*Kakade et al., 2011*) *With probability at least  $1 - \delta$ , it holds for any  $k$  that*

$$\frac{1}{n} \sum_{j=1}^n |\hat{y}_j^k - \bar{y}_j^k| \leq O\left(\left(\frac{W^2 \log(Wn/\delta)}{n}\right)^{1/3}\right).$$

Lemma 5 relates  $\hat{y}_j^k$  (the value we can actually compute) to  $\bar{y}_j^k$  (the value we could compute if we had the conditional means of  $N_j$ ). The proof of this lemma uses the covering number technique and can be found in (*Kakade et al., 2011*).

**Proof of Theorem 6.** With Lemma 3, we can conduct telescoping sum. There can be two cases: either  $\varepsilon(\hat{g}^k, \hat{w}^k) \leq 3C_1(\eta_1 + \eta_2)/C_2$  or  $\varepsilon(\hat{g}^k, \hat{w}^k) \geq 3C_1(\eta_1 + \eta_2)/C_2$ . If it is the first case, then we are done. If it is the second case, then we have:

$$\|w^k - w\|^2 - \|w^{k+1} - w\|^2 \geq C_1(\eta_1 + \eta_2)$$

Since  $\|w^{k+1} - w\|^2 \geq 0$ , and  $\|w^0 - w\|^2 \leq 2W^2$ , by telescoping sum, at iteration  $K$ , we have:

$$2W^2 \geq \|w^0 - w\|^2 - \|w^K - w\|^2 \geq KC_1(\eta_1 + \eta_2)$$

Set  $K = 2W^2/C_1(\eta_1 + \eta_2)$ , if  $k > K$ , then the above inequality does not hold, which means  $\varepsilon(\hat{g}^k, \hat{w}^k) \geq 3C_1(\eta_1 + \eta_2)/C_2$  does not hold. Hence there can be at most  $2W^2/C_1(\eta_1 + \eta_2) = O(W/(\eta_1 + \eta_2))$  iterations before  $\varepsilon(\hat{g}^k, \hat{w}^k) \leq 3C_1(\eta_1 + \eta_2)/C_2$ .

The remaining step is to bound  $\eta_1$  and  $\eta_2$ . We use Lemma 4 to bound  $\eta_1$  and use Lemma 5 to bound  $\eta_2$ . Clearly  $\eta_2$  is the dominant term. Plugging the values of  $\eta_1$  and  $\eta_2$ , we have the conclusion that there is some  $h^k$  such that

$$\varepsilon(\hat{g}^k, \hat{w}^k) \leq O\left(\left(\frac{W^2 \log(Wn/\delta)}{n}\right)^{1/3}\right)$$

## B. Proof of Lemma 6

To prove Lemma 3, a key technique is the generalized calibration property. It generalizes that of isotonic regression in (Kalai & Sastry, 2009) since our objective function is more general. We first state Lemma 6 and then provide the proof.

**Lemma 6** (Generalized Calibration Property). *The solutions to Quadratic Problem in (11) is partitioned into disjoint blocks  $\{\mathcal{P}_l\}_{l=1}^m$ , and for each block  $\mathcal{P}_l$ :*

$$\sum_{i=1}^n (N_i - \sum_{j \in \mathcal{S}_i} a_{ij} \hat{y}_j^k) \sum_{j \in \mathcal{P}_l} a_{ij} = 0 \quad (18)$$

**Proof.** First we define  $a_{ij}$  such that

$$a_{ij} = \begin{cases} a_{ij} & \text{if } j \in \mathcal{S}_i \\ 0 & \text{else} \end{cases}$$

Hence we have

$$\sum_{j=1}^n a_{ij} = \sum_{j \in \mathcal{S}_i} a_{ij} \quad (19)$$

We can rewrite the objective function as:

$$f = \frac{1}{2} \sum_{i=1}^n (N_i - \sum_{j \in \mathcal{S}_i} a_{ij} \hat{y}_j^k)^2 = \frac{1}{2} \sum_{i=1}^n (N_i - \sum_{j=1}^n a_{ij} \hat{y}_j^k)^2$$

Set  $\{\lambda_i\}_{i=1}^{n-1}$  to be the Lagrange multipliers. To update  $\hat{y}_j^k$ , we apply the KKT conditions to (11) and obtain the following formulas:

$$\frac{\partial f}{\partial \hat{y}_1^k} = \sum_{i=1}^n (N_i - \sum_{j=1}^n a_{ij} \hat{y}_j^k) a_{i1} + \lambda_1 = 0 \quad (20)$$

$$\frac{\partial f}{\partial \hat{y}_j^k} = \sum_{i=1}^n (N_i - \sum_{j=1}^n a_{ij} \hat{y}_j^k) a_{ij} + \lambda_j - \lambda_{j-1} = 0, \quad 2 \leq j \leq n-1 \quad (21)$$

$$\frac{\partial f}{\partial \hat{y}_n^k} = \sum_{i=1}^n (N_i - \sum_{j=1}^n a_{ij} \hat{y}_j^k) a_{in} - \lambda_{n-1} = 0 \quad (22)$$

$$\lambda_j (\hat{y}_j^k - \hat{y}_{j+1}^k) = 0, \quad 1 \leq j \leq n-1 \quad (23)$$

$$\lambda_j \geq 0, \quad 1 \leq j \leq n-1 \quad (24)$$

Depending whether  $\hat{y}_j^k$ 's are equal, we can divide the subscript of  $\hat{y}_j^k$  into disjoint sets  $\{\mathcal{P}_l\}_{l=1}^m$  such that in each  $\mathcal{P}_l$ , the values of  $\hat{y}_j^k$  are the same. Hence there exists  $j_1 < j_2 < \dots < j_{m-1} < n$ , such that

$$\mathcal{P}_1 = \{1, \dots, j_1\}, \mathcal{P}_2 = \{j_1 + 1, \dots, j_2\}, \dots, \mathcal{P}_m = \{j_{m-1} + 1, n\} \quad (25)$$

Figure 8 illustrates an example when  $m = 3$ . in this case,  $\mathcal{P}_1 = \{1, 2\}$ ,  $\mathcal{P}_2 = \{3, 4\}$ , and  $\mathcal{P}_3 = \{5, 6\}$ . Now we show the following equality holds for  $l = 1, \dots, m$  in three cases,

$$\sum_{i=1}^n (N_i - \sum_{j=1}^n a_{ij} \hat{y}_j^k) \sum_{j \in \mathcal{P}_l} a_{ij} = 0$$

*Case 1: the first block.* For  $\mathcal{P}_1$ , we sum up equations  $\frac{\partial f}{\partial \hat{y}_j^k} = 0$  according to the index in  $\mathcal{P}_1$ . we have

$$\begin{cases} \sum_{i=1}^n (N_i - \sum_{j=1}^n a_{ij} \hat{y}_j^k) \sum_{j \in \mathcal{P}_1} a_{ij} + \lambda_{j_1} = 0 \\ \lambda_{j_1} = 0 \end{cases} \quad (26)$$

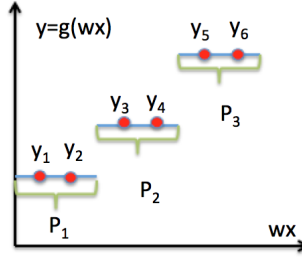

Figure 8. Demonstration for the block partition in (25).  $\mathcal{P}_1$ ,  $\mathcal{P}_2$  and  $\mathcal{P}_3$  are the first, intermediate and last block respectively. In each block,  $\hat{y}$  has the same value.

Since  $\hat{y}_{j_1}^k \neq \hat{y}_{j_1+1}^k$ , from (23) we have  $\lambda_{j_1} = 0$ .

Case 2: the intermediate blocks. For  $2 \leq l \leq m-1$ , in  $\mathcal{P}_l$ , we sum up equations  $\frac{\partial f}{\partial \hat{y}_j^k} = 0$ . Then we have

$$\begin{cases} \sum_{i=1}^n (N_i - \sum_{j=1}^n a_{ij} \hat{y}_j^k) \sum_{j \in \mathcal{P}_l} a_{ij} + \lambda_{j_l} - \lambda_{j_{l-1}} = 0 \\ \lambda_{j_l} = \lambda_{j_{l-1}} = 0 \end{cases} \quad (27)$$

Since  $\hat{y}_{j_l}^k \neq \hat{y}_{j_l+1}^k$  and  $\hat{y}_{j_{l-1}}^k \neq \hat{y}_{j_{l-1}+1}^k$ , from (23) we have  $\lambda_{j_l} = \lambda_{j_{l-1}} = 0$ .

Case 3: the last block. For  $\mathcal{P}_m$ , similarly we have

$$\begin{cases} \sum_{i=1}^n (N_i - \sum_{j=1}^n a_{ij} \hat{y}_j^k) \sum_{j \in \mathcal{P}_m} a_{ij} - \lambda_{j_{m-1}} = 0 \\ \lambda_{j_{m-1}} = 0 \end{cases} \quad (28)$$

From (19), we have for all  $l = 1, \dots, m$

$$\sum_{i=1}^n (N_i - \sum_{j \in \mathcal{P}_l} a_{ij} \hat{y}_j^k) \sum_{j \in \mathcal{P}_l} a_{ij} = 0$$

This completes the proof.

### C. Proof of Lemma 3

First, we have

$$\|\hat{w}^k - w^*\|^2 - \|\hat{w}^{k+1} - w^*\|^2 = 2(\hat{w}^{k+1} - \hat{w}^k) \cdot (w^* - \hat{w}^k) - \|\hat{w}^{k+1} - \hat{w}^k\|^2 \quad (29)$$

$$= \underbrace{\frac{2}{n} \sum_{i=1}^n (N_i - \sum_{j \in \mathcal{S}_i} a_{ij} \hat{y}_j^k) (\sum_{j \in \mathcal{S}_i} a_{ij} x_j \cdot (w^* - \hat{w}^k))}_A - \underbrace{\left\| \frac{1}{n} \sum_{i=1}^n (N_i - \sum_{j \in \mathcal{S}_i} a_{ij} \hat{y}_j^k) \sum_{j \in \mathcal{S}_i} a_{ij} x_j \right\|^2}_B \quad (30)$$

First we simplify  $A$ . Using the following equality:

$$N_i - \sum_{j \in \mathcal{S}_i} a_{ij} \hat{y}_j^k = N_i - \sum_{j \in \mathcal{S}_i} a_{ij} y_j^* + \sum_{j \in \mathcal{S}_i} a_{ij} y_j^* - \sum_{j \in \mathcal{S}_i} a_{ij} \bar{y}_j^k + \sum_{j \in \mathcal{S}_i} a_{ij} \bar{y}_j^k - \sum_{j \in \mathcal{S}_i} a_{ij} \hat{y}_j^k,$$

we can rewrite  $A$  into three parts:

$$A = \frac{2}{n} \sum_{i=1}^n (N_i - \sum_{j \in \mathcal{S}_i} a_{ij} y_j^*) (\sum_{j \in \mathcal{S}_i} a_{ij} x_j) \cdot (w^* - w^k) \quad (31)$$

$$+ \frac{2}{n} \sum_{i=1}^n (\sum_{j \in \mathcal{S}_i} a_{ij} y_j^* - \sum_{j \in \mathcal{S}_i} a_{ij} \bar{y}_j^k) (\sum_{j \in \mathcal{S}_i} a_{ij} x_j \cdot (w^* - w^k)) \quad (32)$$

$$+ \frac{2}{n} \sum_{i=1}^n (\sum_{j \in \mathcal{S}_i} a_{ij} \bar{y}_j^k - \sum_{j \in \mathcal{S}_i} a_{ij} \hat{y}_j^k) (\sum_{j \in \mathcal{S}_i} a_{ij} x_j \cdot (w^* - w^k)) \quad (33)$$

The term (31) is at least  $-2CW\eta_1$ , the term (33) is at least  $-2CW\eta_2$  since  $|\sum_{j \in \mathcal{S}_i} a_{ij} (w - w^k) \cdot x_j| \leq \sqrt{C}W$  and assuming  $C \geq 1$ . We thus bound(32).

First define  $v$ , the inverse of  $g$  as

$$v(y) = \inf\{z \in \text{dom}(g) | g(z) = y\}$$

Note that  $v$  is well defined since  $g$  is monotonic. We also split (32) into three parts,

$$\begin{aligned} & \frac{2}{n} \sum_{i=1}^n (\sum_{j \in \mathcal{S}_i} a_{ij} y_j^* - \sum_{j \in \mathcal{S}_i} a_{ij} \bar{y}_j^k) (\sum_{j \in \mathcal{S}_i} a_{ij} x_j \cdot (w^* - \hat{w}^k)) \\ &= \frac{2}{n} \sum_{i=1}^n (\sum_{j \in \mathcal{S}_i} a_{ij} y_j^* - \sum_{j \in \mathcal{S}_i} a_{ij} \bar{y}_j^k) \sum_{j \in \mathcal{S}_i} a_{ij} v(\bar{y}_j^k) \end{aligned} \quad (34)$$

$$- \frac{2}{n} \sum_{i=1}^n (\sum_{j \in \mathcal{S}_i} a_{ij} y_j^* - \sum_{j \in \mathcal{S}_i} a_{ij} \bar{y}_j^k) \sum_{j \in \mathcal{S}_i} a_{ij} \hat{w}^k \cdot x_j \quad (35)$$

$$+ \frac{2}{n} \sum_{i=1}^n (\sum_{j \in \mathcal{S}_i} a_{ij} y_j^* - \sum_{j \in \mathcal{S}_i} a_{ij} \bar{y}_j^k) \sum_{j \in \mathcal{S}_i} a_{ij} (w^* \cdot x_j - v(\bar{y}_j^k)) \quad (36)$$

As to (34), it is 0 by Lemma 6. To see this, remember that  $\bar{N}_i = \sum_{j \in \mathcal{S}_i} a_{ij} y_i^*$  and  $\bar{y}_j^k$  is the output of the algorithm in Eq. (11) with input  $\{(\bar{w}^k \cdot x_i, \bar{N}_i)\}$ . Apply Lemma 6 and we have the pools  $\{\mathcal{P}_l\}_{l=1}^m$  and

$$\sum_{i=1}^n (\bar{N}_i - \sum_{j \in \mathcal{S}_i} a_{ij} \bar{y}_j^k) \sum_{j \in \mathcal{P}_l} \sum_{j \in \mathcal{S}_i} a_{ij} = 0$$

Define function  $v$  to be the inverse of  $g$ .  $v$  is defined as  $v(y) = \inf\{z \in \text{dom}(g) | g(z) = y\}$ . Since  $g$  is monotonic,  $v$  is well-defined. Since all  $\bar{y}_j^k$  in the same set  $\mathcal{P}_l$  has the same value, then the value  $v(\bar{y}_j^k)$  (the inverse mapping) is also the same. Hence

$$\sum_{i=1}^n (N_i - \sum_{j \in \mathcal{S}_i} a_{ij} \bar{y}_j^k) \sum_{j \in \mathcal{S}_i} a_{ij} v(\bar{y}_j^k) = 0$$

Now sum the above equation up for all sets  $\mathcal{P}_l, l = 1, \dots, m$ , note that  $\bigcup_{l=1}^m \mathcal{P} = \{1, \dots, n\}$ , we have

$$\sum_{i=1}^n (\bar{N}_i - \sum_{j \in \mathcal{S}_i} a_{ij} \bar{y}_j^k) \sum_{j \in \mathcal{S}_i} a_{ij} v(\bar{y}_j^k) = 0$$

As to (35), we show it is always no greater than 0. To see this, we first claim that for any  $\delta > 0$ ,

$$\sum_{i=1}^n (\bar{N}_i - \sum_{j \in \mathcal{S}_i} a_{ij} \bar{y}_j^k)^2 \leq \sum_{i=1}^n (\bar{N}_i - \sum_{j \in \mathcal{S}_i} a_{ij} \bar{y}_j^k - \delta (\sum_{j \in \mathcal{S}_i} a_{ij} x_j) \cdot \hat{w}^k)^2$$

This is because  $\sum_{j \in \mathcal{S}_i} a_{ij} \bar{y}_j^k$  minimizes the sum of squared difference w.r.t.  $\bar{N}_i$  over all such sequences. Rewriting this as a difference of squares gives,

$$\sum_i \delta (\sum_{j \in \mathcal{S}_i} a_{ij} x_j) \cdot \hat{w}^k \left( 2\bar{N}_i - 2 \sum_{j \in \mathcal{S}_i} a_{ij} \bar{y}_j^k - \delta (\sum_{j \in \mathcal{S}_i} a_{ij} x_j) \cdot \hat{w}^k \right) \geq 0$$

Dividing both sides by  $2\delta > 0$ , we have

$$\sum_i (\sum_{j \in \mathcal{S}_i} a_{ij} x_j) \cdot \hat{w}^k \left( \bar{N}_i - \sum_{j \in \mathcal{S}_i} a_{ij} \bar{y}_j^k - \frac{\delta}{2} (\sum_{j \in \mathcal{S}_i} a_{ij} x_j) \cdot \hat{w}^k \right) \geq 0$$

Setting  $\delta \rightarrow 0$ , by continuity we obtain

$$\frac{2}{n} \sum_{i=1}^n (\bar{N}_i - \sum_{j \in \mathcal{S}_i} a_{ij} \bar{y}_j^k) \sum_{j \in \mathcal{S}_i} a_{ij} \hat{w}^k \cdot x_j \geq 0$$

Hence we have (35) always no greater than 0.

As to (36), by 1-Lipschitz property of  $g$ , the first term can be bounded as

$$\begin{aligned} & \frac{2}{n} \sum_{i=1}^n (\sum_{j \in \mathcal{S}_i} a_{ij} y_j^* - \sum_{j \in \mathcal{S}_i} a_{ij} \bar{y}_j^k) \sum_{j \in \mathcal{S}_i} a_{ij} (v(y_j^*) - v(\bar{y}_j^k)) \\ & \geq \frac{2}{n} \sum_{j=1}^n c(y_j^* - \bar{y}_j^k) (v(y_j^*) - v(\bar{y}_j^k)) \\ & \geq \frac{2}{n} \sum_{j=1}^n c(y_j^* - \bar{y}_j^k)^2 = 2c\varepsilon(\bar{g}^k, \bar{w}^k) \end{aligned} \quad (37)$$

Plugging to the definition of  $A$ , we get

$$\boxed{A \geq 2c\varepsilon(\bar{g}^k, \bar{w}^k) - 2CW(\eta_1 + \eta_2)} \quad (38)$$

Next we bound  $B$ . First rewrite  $B$  as:

$$\begin{aligned} B &= \left\| \frac{1}{n} \sum_{i=1}^n (N_i - \sum_{j \in \mathcal{S}_i} a_{ij} y_j^* + \sum_{j \in \mathcal{S}_i} a_{ij} y_j^* - \sum_{j \in \mathcal{S}_i} a_{ij} \hat{y}_j^k) \sum_{j \in \mathcal{S}_i} a_{ij} x_j \right\|^2 \\ &\leq \left\| \frac{1}{n} \sum_{i=1}^n (N_i - \sum_{j \in \mathcal{S}_i} a_{ij} y_j^*) \sum_{j \in \mathcal{S}_i} a_{ij} x_j \right\|^2 \end{aligned} \quad (39)$$

$$+ 2 \left\| \frac{1}{n} \sum_{i=1}^n (N_i - \sum_{j \in \mathcal{S}_i} a_{ij} y_j^*) \sum_{j \in \mathcal{S}_i} a_{ij} x_i \right\| \times \left\| \frac{1}{n} \sum_{i=1}^n (\sum_{j \in \mathcal{S}_i} a_{ij} y_j^* - \sum_{j \in \mathcal{S}_i} a_{ij} \hat{y}_j^k) \sum_{j \in \mathcal{S}_i} a_{ij} x_j \right\| \quad (40)$$

$$+ \left\| \frac{1}{n} \sum_{i=1}^n (\sum_{j \in \mathcal{S}_i} a_{ij} y_j^* - \sum_{j \in \mathcal{S}_i} a_{ij} \hat{y}_j^k) \sum_{j \in \mathcal{S}_i} a_{ij} x_j \right\|^2 \quad (41)$$

From the condition in Lemma 3, we have

$$\left\| \frac{1}{n} \sum_{i=1}^n (N_i - \frac{1}{n} \sum_{i=1}^n \sum_{j \in \mathcal{S}_i} a_{ij} y_j^*) \sum_{j \in \mathcal{S}_i} a_{ij} x_j \right\|^2 \leq C \eta_1^2 \quad (42)$$

Use Jensen's inequality and consider the upper bound  $C$  for  $\|\sum_{j \in \mathcal{S}_i} a_{ij} x_j\|^2$ , we show that

$$\left\| \frac{1}{n} \sum_{i=1}^n \left( \sum_{j \in \mathcal{S}_i} a_{ij} y_j^* - \sum_{j \in \mathcal{S}_i} a_{ij} \hat{y}_j^k \right) \sum_{j \in \mathcal{S}_i} a_{ij} x_j \right\|^2 \leq C \times \frac{1}{n} \sum_{i=1}^n (y_j^* - \hat{y}_j^k)^2 = C \varepsilon(\hat{g}^k, \hat{w}^k) \quad (43)$$

Combining (42) and (43) into (39), (40), (41), assuming  $\eta_1 \leq 1, C \geq 1$ , we have

$$B \leq C \eta_1^2 + 2C \eta_1 \sqrt{\varepsilon(\hat{g}^k, \hat{w}^k)} + C \varepsilon(\hat{g}^k, \hat{w}^k) \leq C \varepsilon(\hat{g}^k, \hat{w}^k) + 3C \eta_1 \quad (44)$$

Hence the we have:

$$\boxed{B \leq C \varepsilon(\hat{g}^k, \hat{w}^k) + 3C \eta_1} \quad (45)$$

Combining the bound for  $A$  in (38) and the bound for  $B$  in (45) into (30), we get

$$\boxed{\|\hat{w}^k - \hat{w}\|^2 - \|\hat{w}^{k+1} - \hat{w}\|^2 \geq 2c \varepsilon(\bar{g}^k, \bar{w}^k) - C \varepsilon(\hat{g}^k, \hat{w}^k) - CW(5\eta_1 + 2\eta_2)} \quad (46)$$

To finish the proof, we establish the relationship between  $\varepsilon(\bar{g}^k, \bar{w}^k)$  and  $\varepsilon(\hat{g}^k, \hat{w}^k)$  as follows: we claim that the difference between  $\varepsilon(\bar{g}^k, \bar{w}^k)$  and  $\varepsilon(\hat{g}^k, \hat{w}^k)$  can be lower bounded:

$$\boxed{\varepsilon(\bar{g}^k, \bar{w}^k) - \varepsilon(\hat{g}^k, \hat{w}^k) \geq -2M \eta_2 / \sqrt{c}} \quad (47)$$

To see this, we have:

$$\begin{aligned} \varepsilon(\bar{g}^k, \bar{w}^k) &= \frac{1}{n} \sum_{j=1}^n (\bar{y}_j^k - y_j^*)^2 \\ &= \frac{1}{n} \sum_{j=1}^n (\bar{y}_j^k - \hat{y}_j^k + \hat{y}_j^k - y_j^*)^2 \\ &= \frac{1}{n} \sum_{j=1}^n (\hat{y}_j^k - y_j^*)^2 + \frac{1}{n} \sum_{j=1}^n (\bar{y}_j^k - \hat{y}_j^k)(\bar{y}_j^k + \hat{y}_j^k - 2y_j^*) \\ &= \varepsilon(\hat{g}^k, \hat{w}^k) + \frac{1}{n} \sum_{j=1}^n (\bar{y}_j^k - \hat{y}_j^k)(\bar{y}_j^k + \hat{y}_j^k - 2y_j^*) \end{aligned}$$

and we have  $|\bar{y}_j^k + \hat{y}_j^k - 2y_j^*| \leq 2M$ . Plugging this and the following inequality leads to (47).

$$\frac{1}{n} \sum_{j=1}^n |\hat{y}_j^k - \bar{y}_j^k| \leq \frac{1}{n} \sum_{j=1}^n \sum_{i \in \mathcal{S}_j} a_{ij} / \sqrt{c} |\hat{y}_j^k - \bar{y}_j^k| \leq \eta_2 / \sqrt{c}$$

Combine (47) and (46), we have

$$\boxed{\|w^k - w\|^2 - \|w^{k+1} - w\|^2 \geq (2c - C) \varepsilon(\hat{g}^k, \hat{w}^k) - 4M \sqrt{c} \eta_2 - CW(5\eta_1 + 2\eta_2) \geq C_2 \varepsilon(\hat{g}^k, \hat{w}^k) - C_1(\eta_1 + \eta_2)}$$

where  $C_1 = \max\{5CW, 4M\sqrt{c} + 2CW\}$ ,  $C_2 = (2c - C)$ , this completes the proof.

## D. Proof of Lemma 4

We have  $N_i - \bar{N}_i = M_i$ , which is the martingale at time  $t_i$ . The martingale serves as the noise term in point processes (similar to Gaussian noise in regression) and can be bounded using the Bernstein-type concentration inequality. First, we have the following martingale inequality (Aalen et al., 2008; Liptser & Shiriyayev, 2012): for each  $\epsilon$  and some  $t$ , we have

$$\mathbb{P}[|M(t)| > \epsilon] \leq \exp\left(-\frac{\epsilon^2}{2(k^2 + \epsilon K)}\right)$$

In our case, for each  $i$ , we have  $N_i = \Lambda(t_i) + M(t_i)$ , where  $\Lambda(t)$  is the compensator and  $M(t)$  is the zero-mean martingale. Also we have  $\bar{N}_i = \mathbb{E}(N_i) = \Lambda(t_i)$ . Hence  $N_i - \bar{N}_i = M(t_i) = M_i$ . Now we set  $\delta = \mathbb{P}[|M(t)| > \epsilon]$ , then with probability at least  $1 - \delta$ ,  $|M(t)| \leq \epsilon$ . Set  $\delta = \exp\left(-\frac{\epsilon^2}{2(k^2 + \epsilon K)}\right)$ , then we have the equation

$$\epsilon^2 - 2K \log\left(\frac{1}{\delta}\right)\epsilon - 2k^2 \log\left(\frac{1}{\delta}\right) = 0$$

Hence

$$\begin{aligned} \epsilon &= \frac{2K \log\left(\frac{1}{\delta}\right) + \sqrt{4K^2 \left(\log\left(\frac{1}{\delta}\right)\right)^2 + 8k^2 \log\left(\frac{1}{\delta}\right)}}{2} \\ &\leq K \log\left(\frac{1}{\delta}\right) + \sqrt{4K^2 + 8k^2} \left(\log\left(\frac{1}{\delta}\right)\right)^{1/2} \\ &\leq (K + \sqrt{4K^2 + 8k^2}) \left(\log\left(\frac{1}{\delta}\right)\right)^{1/2} \end{aligned}$$

Here we have used the fact that  $(\log(1/\delta))^2 \leq \log(1/\delta) \leq \sqrt{\log(1/\delta)}$ . We can obtain that

$$\epsilon = O\left((K + \sqrt{4K^2 + 8k^2}) \left(\log\left(\frac{1}{\delta}\right)\right)^{1/2}\right)$$

Hence we have

$$\frac{1}{n} \sum_{i=1}^n |N_i - \bar{N}_i| = \frac{1}{n} \sum_{i=1}^n |M_i| \leq O\left((K + \sqrt{4K^2 + 8k^2}) \left(\log\left(\frac{1}{\delta}\right)\right)^{1/2}\right)$$
